# Supplementary material for: Genome ARTIST_v2—An Autonomous Bioinformatics Tool for Annotation of Natural Transposons in Sequenced Genomes
Source: MDPI journal article supplement (doi:10.3390/ijms232012686), 2022-10-21
Supplement: s1 [file s1]

## Videos S1-S4 - details

Video\_S1\_Running\_GA.mp4 – The S1 video presents a concise tutorial describing the succession of steps required to run GA\_v2. It includes (i) one of the sources for GA\_v2 download; (ii) the instructions for starting GA\_v2; (iii) how to make the conversion of FASTA files into GA\_v2-specific raw files; (iv) a brief presentation of GA\_v2's graphic interface; (v) how to load an ARG in GD.

Video\_S2\_Loading\_Genomes.mp4 – The S2 video shows how to download various drosophilid genomes from FlyBase/Ensembl along with genes/TEs annotations. It also details the use of specific scripts for processing the downloaded data and how to add the resulting files into the Genome files of GA\_v2.

Video\_S3\_GA\_WF1.mp4 – The S3 video displays an example of how to implement the WF1. The video starts with the scan of an ARG with a query sequence represented by a subsequence of a P-element, as a prerequisite to find contigs harboring NTs insertions. Subsequently, the alignments coordinates are retrieved and used for extraction of JQs.

Video\_S4\_GA\_WF2.mp4 – The S4 video describes a case of a P-element mapping, where the JQs generated by WF1 are aligned to the *Drosophila melanogaster* reference genome during WF2. This video illustrates how to visualize the genomic context in which the NT is inserted, how to export the results in a tabular form and how to upload GA\_v2 alignments in GUI.
